# Supplementary material for: High-volume hybridoma sequencing on the NeuroMabSeq platform enables efficient generation of recombinant monoclonal antibodies and scFvs for neuroscience research
Source: PubMed Central journal article supplement (PMC10533561; doi:10.1038/s41598-023-43233-4), 2023-09-27
Supplement: 41598_2023_43233_MOESM1_ESM.pdf [file 41598_2023_43233_MOESM1_ESM.pdf]

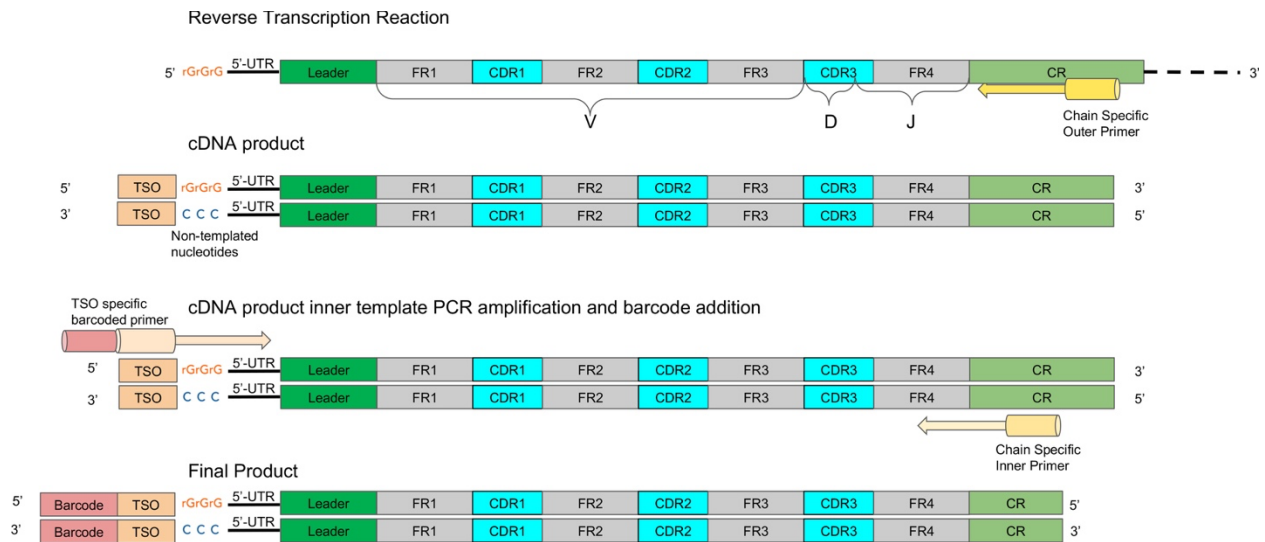

**Supplementary Figure 1.** cDNA synthesis and PCR amplification overview. Schematic shows location of nested chain-specific primers used for cDNA synthesis (outer) and PCR amplification (inner). Also shown is the location of the template switching oligonucleotide. Schematic depicts the synthesis and amplification of VH domain cDNA, analogous steps are used for VL domains. FR: framework regions; CDR: complementarity determining regions; CR: constant region.

**Supplementary Table 1. List of primers and barcodes.**

| Oligonucleotide                             | Vendor | Cat #     | Sequence                                      |
|---------------------------------------------|--------|-----------|-----------------------------------------------|
| RT Chain Specific Outer Primer mix          |        |           |                                               |
| RT-mIGK                                     | IDT    | 271038654 | TTGTCGTTCACTGCCATCAAT*C                       |
| RT-mIGHG                                    | IDT    | 271038655 | AGCTGGGAAGGTGTGCACA*C                         |
| RT-mIGL                                     | IDT    | 271038656 | GGGGTACCATCTACCTTCCA*C                        |
| RT-mIGHG3-NEW                               | IDT    | 271038657 | GTACAGATGAGACTGTGCGCACA*C                     |
|                                             |        |           |                                               |
| TSO-short                                   | IDT    | 408473058 | /5Biosg/AAGCAGTGGTATCAACGCAGAGTACA<br>TrGrGrG |
|                                             |        |           |                                               |
| PCR Chain Specific Reverse Inner Primer Mix |        |           |                                               |
| 10for-mIgh3                                 | IDT    | 270929982 | GGATAGACAGATGGGGCTGTTGTTGTAG*C                |
| PCR-R-mIGL                                  | IDT    | 270929983 | ATCGTACACACCAGTGTGG*C                         |
| 6-REV-LC                                    | IDT    | 270929984 | GGATACAGTTGGTGCAGCAT*C                        |
| 10-REV-HC1                                  | IDT    | 270929985 | ATAGACAGATGGGGGTGTCGTTTTGG*C                  |

| F Primer, ISPCR (Barcoded) PCR-SMART indices | Sequence                        |
|----------------------------------------------|---------------------------------|
| 01-SMARTindex                                | CAGCGTCAGTGGTATCAACGCAGAGTACA   |
| 02-SMARTindex                                | GATCACCAGTGGTATCAACGCAGAGTACA   |
| 03-SMARTindex                                | ACCAGTCAGTGGTATCAACGCAGAGTACA   |
| 04-SMARTindex                                | TGCACGCAGTGGTATCAACGCAGAGTACA   |
| 05-SMARTindex                                | ACATTACAGTGGTATCAACGCAGAGTACA   |
| 06-SMARTindex                                | GTGTAGCAGTGGTATCAACGCAGAGTACA   |
| 07-SMARTindex                                | CTAGTCCAGTGGTATCAACGCAGAGTACA   |
| 08-SMARTindex                                | TGTGCACAGTGGTATCAACGCAGAGTACA   |
| 09-SMARTindex                                | TCAGGAACAGTGGTATCAACGCAGAGTACA  |
| 10-SMARTindex                                | CGGTAAACAGTGGTATCAACGCAGAGTACA  |
| 11-SMARTindex                                | TTAACTACAGTGGTATCAACGCAGAGTACA  |
| 12-SMARTindex                                | ATGAACACAGTGGTATCAACGCAGAGTACA  |
| 13-SMARTindex                                | CCTAAGACAGTGGTATCAACGCAGAGTACA  |
| 14-SMARTindex                                | AATCCGACAGTGGTATCAACGCAGAGTACA  |
| 15-SMARTindex                                | GGCTGCACAGTGGTATCAACGCAGAGTACA  |
| 16-SMARTindex                                | TACCTTACAGTGGTATCAACGCAGAGTACA  |
| 17-SMARTindex                                | TCTTAATCAGTGGTATCAACGCAGAGTACA  |
| 18-SMARTindex                                | GTCAGGTCAGTGGTATCAACGCAGAGTACA  |
| 19-SMARTindex                                | ATACTGTCAGTGGTATCAACGCAGAGTACA  |
| 20-SMARTindex                                | TATGTCTCAGTGGTATCAACGCAGAGTACA  |
| 21-SMARTindex                                | GAGTCCTCAGTGGTATCAACGCAGAGTACA  |
| 22-SMARTindex                                | GGAGGTTCAAGTGGTATCAACGCAGAGTACA |
| 23-SMARTindex                                | CACACTTCAGTGGTATCAACGCAGAGTACA  |
| 24-SMARTindex                                | CCGCAATCAGTGGTATCAACGCAGAGTACA  |
| 25-SMARTindex                                | TTTATGCAGTGGTATCAACGCAGAGTACA   |
| 26-SMARTindex                                | AACGCCACAGTGGTATCAACGCAGAGTACA  |
| 27-SMARTindex                                | CAAGCACAGTGGTATCAACGCAGAGTACA   |
| 28-SMARTindex                                | GCTCGACAGTGGTATCAACGCAGAGTACA   |
| 29-SMARTindex                                | GCGAATCAGTGGTATCAACGCAGAGTACA   |
| 30-SMARTindex                                | TGGATTCAAGTGGTATCAACGCAGAGTACA  |
| 31-SMARTindex                                | ACCTACCAGTGGTATCAACGCAGAGTACA   |
| 32-SMARTindex                                | CGAAGGCAGTGGTATCAACGCAGAGTACA   |
| 33-SMARTindex                                | AGATAGAACAGTGGTATCAACGCAGAGTACA |
| 34-SMARTindex                                | TTGGTAAACAGTGGTATCAACGCAGAGTACA |

|               |                                 |
|---------------|---------------------------------|
| 35-SMARTindex | GTTACCAACAGTGGTATCAACGCAGAGTACA |
| 36-SMARTindex | CGCAACAACAGTGGTATCAACGCAGAGTACA |
| 37-SMARTindex | TGGCGAAACAGTGGTATCAACGCAGAGTACA |
| 38-SMARTindex | ACCGTGAACAGTGGTATCAACGCAGAGTACA |
| 39-SMARTindex | CAACAGAACAGTGGTATCAACGCAGAGTACA |
| 40-SMARTindex | GATTGTAACAGTGGTATCAACGCAGAGTACA |
| 41-SMARTindex | CTCTCGATCAGTGGTATCAACGCAGAGTACA |
| 42-SMARTindex | TGACACATCAGTGGTATCAACGCAGAGTACA |
| 43-SMARTindex | AAGACAATCAGTGGTATCAACGCAGAGTACA |
| 44-SMARTindex | ACAGATATCAGTGGTATCAACGCAGAGTACA |
| 45-SMARTindex | TAGGCTATCAGTGGTATCAACGCAGAGTACA |
| 46-SMARTindex | CTCCATATCAGTGGTATCAACGCAGAGTACA |
| 47-SMARTindex | GCATGGATCAGTGGTATCAACGCAGAGTACA |
| 48-SMARTindex | AATAGCATCAGTGGTATCAACGCAGAGTACA |
| 49-SMARTindex | GTGCCATACAGTGGTATCAACGCAGAGTACA |
| 50-SMARTindex | TCGAGGTACAGTGGTATCAACGCAGAGTACA |
| 51-SMARTindex | CACTAATACAGTGGTATCAACGCAGAGTACA |
| 52-SMARTindex | GGTATATACAGTGGTATCAACGCAGAGTACA |
| 53-SMARTindex | CGCCTGTACAGTGGTATCAACGCAGAGTACA |
| 54-SMARTindex | AATGAATACAGTGGTATCAACGCAGAGTACA |
| 55-SMARTindex | ACAACGTACAGTGGTATCAACGCAGAGTACA |
| 56-SMARTindex | ATATCCTACAGTGGTATCAACGCAGAGTACA |
| 57-SMARTindex | AGTACTCAGTGGTATCAACGCAGAGTACA   |
| 58-SMARTindex | ATAAGACAGTGGTATCAACGCAGAGTACA   |
| 59-SMARTindex | GGTGAGCAGTGGTATCAACGCAGAGTACA   |
| 60-SMARTindex | TTCCGCCAGTGGTATCAACGCAGAGTACA   |
| 61-SMARTindex | GAAGTGCAGTGGTATCAACGCAGAGTACA   |
| 62-SMARTindex | CAATGCCAGTGGTATCAACGCAGAGTACA   |
| 63-SMARTindex | ACGTCTCAGTGGTATCAACGCAGAGTACA   |
| 64-SMARTindex | CAGGACCAGTGGTATCAACGCAGAGTACA   |
| 65-SMARTindex | AAGCTCCAGTGGTATCAACGCAGAGTACA   |
| 66-SMARTindex | GACGATCAGTGGTATCAACGCAGAGTACA   |
| 67-SMARTindex | TCGTTCCAGTGGTATCAACGCAGAGTACA   |
| 68-SMARTindex | CCAATTCAGTGGTATCAACGCAGAGTACA   |
| 69-SMARTindex | AGTTGACAGTGGTATCAACGCAGAGTACA   |
| 70-SMARTindex | AACCGACAGTGGTATCAACGCAGAGTACA   |
| 71-SMARTindex | CAGATGCAGTGGTATCAACGCAGAGTACA   |
| 72-SMARTindex | GTAGAACAGTGGTATCAACGCAGAGTACA   |
| 73-SMARTindex | GACATCACAGTGGTATCAACGCAGAGTACA  |
| 74-SMARTindex | CGATCTACAGTGGTATCAACGCAGAGTACA  |
| 75-SMARTindex | CGTCGCACAGTGGTATCAACGCAGAGTACA  |
| 76-SMARTindex | ATGGCGACAGTGGTATCAACGCAGAGTACA  |
| 77-SMARTindex | ATTGGTACAGTGGTATCAACGCAGAGTACA  |
| 78-SMARTindex | GCCACAACAGTGGTATCAACGCAGAGTACA  |
| 79-SMARTindex | CATCTAACAGTGGTATCAACGCAGAGTACA  |
| 80-SMARTindex | AACAAGACAGTGGTATCAACGCAGAGTACA  |
| 81-SMARTindex | GCAGCCTCAGTGGTATCAACGCAGAGTACA  |
| 82-SMARTindex | ACTCTTTCAGTGGTATCAACGCAGAGTACA  |
| 83-SMARTindex | TGCTATTCAGTGGTATCAACGCAGAGTACA  |
| 84-SMARTindex | AAGTGGTCAGTGGTATCAACGCAGAGTACA  |
| 85-SMARTindex | CTCATATCAGTGGTATCAACGCAGAGTACA  |
| 86-SMARTindex | CCGACCTCAGTGGTATCAACGCAGAGTACA  |
| 87-SMARTindex | GGCCAATCAGTGGTATCAACGCAGAGTACA  |

|               |                                |
|---------------|--------------------------------|
| 88-SMARTindex | AGACCATCAGTGGTATCAACGCAGAGTACA |
| 89-SMARTindex | CGCGGACAGTGGTATCAACGCAGAGTACA  |
| 90-SMARTindex | CCTGCTCAGTGGTATCAACGCAGAGTACA  |
| 91-SMARTindex | GCGCTGCAGTGGTATCAACGCAGAGTACA  |
| 92-SMARTindex | GAACCTCAGTGGTATCAACGCAGAGTACA  |
| 93-SMARTindex | TTCGAGCAGTGGTATCAACGCAGAGTACA  |
| 94-SMARTindex | AGAATCCAGTGGTATCAACGCAGAGTACA  |
| 95-SMARTindex | AGGCATCAGTGGTATCAACGCAGAGTACA  |
| 96-SMARTindex | ACACGCCAGTGGTATCAACGCAGAGTACA  |

**Supplementary Table 1.** Top table. Sequences of oligonucleotides used for priming cDNA synthesis and for amplification of  $V_L$  and  $V_H$  domains. Bottom table. Sequences of oligonucleotides used to barcode samples.

**Supplementary Table 2. List of R-mAbs successfully cloned via sequence-based cloning.**

| R-mAb    | Target                                   | R-mAb     | Target                                 | R-mAb    | Target                           | R-mAb    | Target                             |
|----------|------------------------------------------|-----------|----------------------------------------|----------|----------------------------------|----------|------------------------------------|
| 1D8      | LRRK2/Dardarin-pSer910                   | L114/3    | Parvalbumin                            | N133/35  | RGS14                            | N358/68  | 5-formylcytidine                   |
| 1F1      | TrpC1                                    | L114/38   | Parvalbumin                            | N134/12  | Nav1.8 Na <sup>+</sup> channel   | N360A/24 | ATF4                               |
| 62-3G1   | GABA(A)R, Beta2/3                        | L114/81   | Parvalbumin                            | N138/6   | LRRK2/Dardarin, N-terminus       | N363/71  | Kir6.2 K <sup>+</sup> channel      |
| 8G10     | LRRK2/Dardarin, N-terminus               | L115/13   | NPY Neuropeptide Y                     | N140A/12 | SALM5/LRFN5                      | N364/10  | Bral1                              |
| A12/18   | Pan-Neurofascin (extracellular)          | L117/1    | IRSp53/BAIAP2                          | N141/21  | HCN3                             | N364/42  | Bral1                              |
| D4/11    | Kv2.1 K <sup>+</sup> channel             | L117/52   | IRSp53/BAIAP2                          | N141/28  | HCN3                             | N366/60  | Kir6.1 K <sup>+</sup> channel      |
| D4/154   | Kv2.1 K <sup>+</sup> channel             | L118/14   | VGAT                                   | N142/28  | GRK6A/B                          | N367/51  | Shank1 and Shank3                  |
| D4/40    | Kv2.1 K <sup>+</sup> channel             | L118/80   | VGAT                                   | N143/36  | CDY1/2/L1/L2                     | N367/62  | Shank3                             |
| K14/39   | Kv1.2 K <sup>+</sup> channel             | L118/135  | VGAT                                   | N143/38  | CDY1/2                           | N372A/1  | Kv2.2 K <sup>+</sup> channel       |
| K19/46   | Kv1.6 K <sup>+</sup> channel             | L119/106  | NPY2R Neuropeptide Y receptor type 2   | N144/14  | 6xHis                            | N372B/1  | Kv2.2 K <sup>+</sup> channel       |
| K28/25   | PSD-95 + PSD-93                          | L119/134* | NPY2R Neuropeptide Y receptor type 2   | N144/17  | Gamma-protocadherin-A3           | N372B/60 | Kv2.2 K <sup>+</sup> channel       |
| K28/27   | PSD-95                                   | L120/12   | Collybistin                            | N144/32  | Pan-Gamma-protocadherin-A        | N372C/51 | Kv2.2 K <sup>+</sup> channel       |
| K28/38   | PSD-95                                   | L120/30   | Collybistin                            | N145/20  | Pan-GRK                          | N374/48  | TASK1 K <sup>+</sup> channel       |
| K28/42   | PSD-95 + PSD-93                          | L121/25   | nNOS/NOS1                              | N148/30  | Gamma-protocadherin-B2           | N375/67  | Kv3.3 K <sup>+</sup> channel       |
| K28/58   | PSD-95                                   | L121/42   | nNOS/NOS1                              | N152B/23 | VDAC1                            | N377/20  | MAP3K12                            |
| K28/74   | PSD-95                                   | L121/133  | nNOS/NOS1                              | N154/32  | JMJD2A                           | N377/83  | MAP3K12                            |
| K28/86   | Pan-MAGUK                                | L121/136  | nNOS/NOS1                              | N155/9   | Uncx                             | N37A/10  | Kv7.1/KCNQ1 K <sup>+</sup> channel |
| K28/94   | PSD-95                                   | L122/6    | Calretinin                             | N158/28  | Histone H3.3                     | N380/87  | CLN3                               |
| K40/17   | Pan-Kvbeta K <sup>+</sup> channel        | L122/68   | Calretinin                             | N159/5   | Pan-Gamma-protocadherin-Constant | N382/14  | MFF                                |
| K47/9    | Kvbeta1.2/KCNA B1 K <sup>+</sup> channel | L122/144  | Calretinin                             | N160/21  | SynDIG3/Tmem91                   | N382/69  | MFF (exon 1)                       |
| K47/42   | Kvbeta1.2/KCNA B1 K <sup>+</sup> channel | L123/46   | GABA(A)R, Theta                        | N161/20  | NKCC1                            | N384/63  | Miro2                              |
| K55/7*   | KChIP1 K <sup>+</sup> channel            | L124/59   | Bassoon                                | N165/38  | LAR/PTPRF                        | N385/21  | Beta1-spectrin                     |
| K55/29   | KChIP1 K <sup>+</sup> channel            | L125/121  | Synapsin-3                             | N165/43  | Pan-PTPR                         | N388A/27 | Ankyrin-R/G                        |
| K55/82   | Pan-KChIP K <sup>+</sup> channel         | L125/129  | Pan-Synapsin                           | N166A/26 | OCRL/INPP5b                      | N389/9   | TRAK1                              |
| K56A/50  | CASK                                     | L125/76   | SAPAP3                                 | N170A/26 | Neurexin-1-Beta                  | N390/43  | TRAK2                              |
| K56A/57  | CASK                                     | L126/93   | SAPAP3                                 | N173B/13 | Tafazzin                         | N391/68  | WNK1                               |
| K57/27   | Kv4.2 K <sup>+</sup> channel (external)  | L127/8    | GAD67                                  | N180/41  | EAAC1                            | N393/2   | Beta4-spectrin                     |
| K57/41   | Kv4.2 K <sup>+</sup> channel (external)  | L127/12   | GAD65/67                               | N183/15  | QKI-7                            | N393/76  | Beta4-spectrin                     |
| K60/73   | KChIP2b K <sup>+</sup> channel           | L130/1    | Tiam1                                  | N185/7   | NALCN                            | N395/68  | Navbeta2 Na <sup>+</sup> channel   |
| K60/87** | KChIP2b K <sup>+</sup> channel           | L131/17   | SPHKAP                                 | N186/29  | Dopamine D2 receptor             | N396/29  | Navbeta3 Na <sup>+</sup> channel   |
| K65/35   | CASPR/Neurexin IV                        | L131/20   | SPHKAP                                 | N191/7   | Fratxin                          | N397/19  | Nav1.5 Na <sup>+</sup> channel     |
| K65A/2   | CASPR/Neurexin IV                        | L131/27   | SPHKAP                                 | N192/12  | Gs protein, alpha subunit        | N398A/34 | GABA(A)R, Alpha4                   |
| K66/27   | KChIP3 K <sup>+</sup> channel            | L132/18   | Cav1.2 Ca <sup>2+</sup> channel pS1928 | N194/11  | QKI-7b                           | N399/19  | GABA(A)R, Alpha2                   |
| K66/59   | KChIP3 K <sup>+</sup> channel            | L132/37   | Cav1.2 Ca <sup>2+</sup> channel pS1928 | N202/7   | Fig4/Sac3                        | N400/24  | CLN6                               |
| K67/11   | CASPR2                                   | N1/12     | KCC2                                   | N206A/8  | GFAP                             | N402/13  | Thyroid hormone receptor beta1     |

|         |                                            |         |                                       |          |                                         |          |                                |
|---------|--------------------------------------------|---------|---------------------------------------|----------|-----------------------------------------|----------|--------------------------------|
| K67/25  | CASPR2                                     | N4/15   | PINK1                                 | N207/27  | LRP4 (extracellular)                    | N402/46  | Thyroid hormone receptor beta1 |
| K69/3*  | Nav1.2 Na+ channel                         | N4/49   | PINK1                                 | N209C/35 | LRRTM2                                  | N403/63  | Pan-Thyroid hormone receptor   |
| K69/33  | Nav1.2 Na+ channel                         | N6/38   | VACHT                                 | N210/5   | PhyH/PAHX                               | N405/74  | Navbeta1 Na+ channel           |
| K73/20  | Contactin/F3                               | N10/7   | Cavbeta4 Ca2+ channel                 | N212/7   | TRIP8b (constant)                       | N406/47  | Cln5                           |
| K74/53  | Nav1.1 Na+ channel                         | N15/4   | TrpV3                                 | N212A/34 | TRIP8b (exon 1b)                        | N408/79  | Npas4                          |
| K75/18  | Kv4.3 K+ channel                           | N15/39  | TrpV3                                 | N219/5   | RBM17/SPF45                             | N410/17  | Kv3.2 K+ channel               |
| K75/30  | Kv4.3 K+ channel                           | N18/28  | PSD-93/Chapsyn-110                    | N221/12  | TrpV1                                   | N411/51  | Arx                            |
| K78/29  | SK2 K+ channel                             | N18/30  | PSD-93/Chapsyn-110                    | N221/17  | TrpV1                                   | N414/25  | NCKX4                          |
| K87A/10 | Nav1.6 Na+ channel                         | N19/2   | SAP102                                | N225A/10 | FGF13/FHF2, B isoform                   | N416/57  | GluN3A/NR3A glutamate receptor |
| K89/41  | Kv2.1 K+ channel                           | N22/21  | Shank1                                | N227/21  | MECP2                                   | N420/24  | EAAC1                          |
| K96/7   | Pancortin                                  | N23B/6  | Shank2                                | N228A/16 | Lhx6.1                                  | N421A/85 | ANO5/TMEM16E                   |
| L6/48   | Slo1/BKAlpha maxi-K+ channel               | N25/35  | Kir2.3 K+ channel                     | N229A/32 | GABA(A)R, Alpha6                        | N422/18  | GluN2C/NR2C glutamate receptor |
| L6/60   | Slo1/BKAlpha maxi-K+ channel               | N26A/23 | Kv7.2/KCNQ2 K+ channel                | N231B/34 | LRRK2/Dardarin, N3 (non-mouse-reactive) | N423/75  | KChIP4 K+ channel              |
| L21/32  | GluA2/GluR2 glutamate receptor             | N38/8   | Cav1.3 Ca2+ channel                   | N232/9   | PEX7                                    | N424/45  | Glycine receptor Alpha3        |
| L23/27  | Kv1.3 K+ channel                           | N39B/8  | GIT1                                  | N233/8   | PEX6                                    | N424/48* | Glycine receptor Alpha3L       |
| L24/1   | IP3 receptor, type 1                       | N43/6   | Kv7.4/KCNQ4 K+ channel                | N238/29  | SAPAP1                                  | N425/45  | VACHT                          |
| L24/11  | IP3 receptor, type 1                       | N46/30  | ADAM22 (cytoplasmic)                  | N238/30  | SAPAP1                                  | N428/12  | WRN                            |
| L24/18  | IP3 receptor, type 1                       | N49A/21 | NGL-1/LRRC4C                          | N238/31  | SAPAP1/2                                | N429/19  | ANO6/TMEM16F                   |
| L24/19  | IP3 receptor, type 1                       | N50/36  | NGL-2/LRRC4                           | N241A/34 | LRRK2/Dardarin, C-terminus              | N431/64  | GABA(A)R, Pi                   |
| L24/21  | IP3 receptor, type 1                       | N52B/27 | SALM2/LRFN1                           | N241A/72 | LRRK2/Dardarin, C-terminus              | N432/21  | VSP                            |
| L28/36  | Kv4.2 K+ channel                           | N53/32  | BKbeta2 K+ channel                    | N245/1   | TARPGamma2/Stargazin                    | N432/63  | VSP                            |
| L45/30  | SynCAM1                                    | N55/10  | Cav3.2 Ca2+ channel                   | N245/36  | TARPGamma2/4/8                          | N440/21  | VMAT1                          |
| L48A/9  | Cav1.3 Ca2+ channel                        | N56/9   | S-tag                                 | N245/44  | Thioredoxin                             | N440/61  | VMAT1                          |
| L48A/29 | Cav1.3 Ca2+ channel                        | N56/21  | FGF14/FHF4                            | N250/21  | DNAH7                                   | N441/35  | ADAM11                         |
| L48A/31 | Cav1.3 Ca2+ channel                        | N57/2   | ADAM22 (extracellular)                | N251/14  | DNAH1                                   | N442/28  | Alg13                          |
| L57/23  | Cav1.2/1.3 Ca2+ channel                    | N59/20  | GluN2B/NR2B glutamate receptor        | N253/32  | Notch1                                  | N444/63  | AGPS neo-epitope               |
| L57/46  | Cav1.2/1.3 Ca2+ channel                    | N64A/36 | TrpC7                                 | N255/38  | Nav1.4 Na+ channel                      | N445/27  | TRAAK K+ channel               |
| L57/47  | Cav1.2/1.3 Ca2+ channel                    | N67/15  | TrpC5                                 | N263/31  | Cav1.2 Ca2+ channel                     | N446/80  | CELF4/BRUNO L4                 |
| L58A/6  | Kv2.1 K+ channel                           | N68/6   | Nav1.7 Na+ channel                    | N270/47  | Synaptotagmin-6                         | N447/24  | Kv11.3 K+ channel              |
| L61C/30 | Kv2.1 K+ channel                           | N71/37  | HCN2                                  | N271/44  | ASIC1                                   | N448/88  | Kv8.2 K+ channel               |
| L62/29  | Copper ATPase 2 (Wilson's disease protein) | N72/16  | Kv3.4 K+ channel                      | N274/8   | Synaptotagmin-5                         | N449/73  | VMAT2                          |
| L64/32  | Kv1.2 K+ channel                           | N74/25  | TrpM7                                 | N275/14  | Synaptotagmin-7                         | N450/53* | BDNF                           |
| L71/5   | Kv1.4 K+ channel (extracellular)           | N75/3   | mGluR1/5 (Group I) glutamate receptor | N276A/15 | Synaptotagmin-9                         | N451/73  | ICK                            |
| L71/22  | Kv1.4 K+ channel (extracellular)           | N75/33  | mGluR1/5 (Group I) glutamate receptor | N283/7   | Lgi1                                    | N452/30  | GABA(A)R, Gamma2L/S            |
| L76/36  | Kv1.2 K+ channel                           | N77/15  | TrpC4                                 | N286/74  | Zebrafish PSD Marker                    | N452/69  | GABA(A)R, Gamma2L              |

|          |                        |          |                                                 |           |                                |          |                          |
|----------|------------------------|----------|-------------------------------------------------|-----------|--------------------------------|----------|--------------------------|
| L80/21   | Kv2.1 K+ channel       | N81/2    | GABA(B)R2                                       | N290B/25  | ARHGAP4                        | N452/73  | GABA(A)R, Gamma2L/S      |
| L83/11   | Kv2.1 K+ channel       | N86/20   | GFP                                             | N294A/10  | Brevican                       | N452/81  | GABA(A)R, Gamma2L/S      |
| L83/81   | Kv2.1 K+ channel       | N86/44   | GFP                                             | N294A/6   | Brevican                       | N454/91  | ANO3/TMEM16C             |
| L86/2    | AMIGO-1                | N86/8    | GFP                                             | N295B/54  | Arl13b                         | N455/15  | Kir3.3 K+ channel        |
| L86/14   | AMIGO-1                | N87/25   | GABA(A)R, Beta3                                 | N302/10   | BBS3/Arl6                      | N456/39  | Proser1                  |
| L86/33*  | AMIGO-1                | N92/14   | FGF11/FHF3                                      | N304B/115 | BBS5                           | N458/10  | Kv6.4 K+ channel         |
| L86/36   | AMIGO-1                | N95/35   | GABA(A)R, Alpha1                                | N307/12   | Histone H3-acetyl-Lys56        | N459/84  | SAPAP2                   |
| L100/1   | Kv2.1 K+ channel pS586 | N98/47   | Neuroigin-4                                     | N308/48   | GluN1/NR1 glutamate receptor   | N460/19  | Kv9.2 K+ channel         |
| L102/45  | SynDIG4/Prnt1          | N100/13  | GST                                             | N309A/21  | Histone H4-dimethyl-Arg3       | N461/19  | Kv9.1 K+ channel         |
| L106/4   | Gephyrin               | N104/37  | SNAT1                                           | N312/10   | NSD1                           | N463/52* | DEPDC5                   |
| L106/22  | Gephyrin               | N105/13  | Ankyrin-B                                       | N319A/14  | SUR2A                          | N465/11  | Kir2.4 K+ channel        |
| L106/23  | Gephyrin               | N105/17  | Ankyrin-B                                       | N323A/31  | SUR1 and SUR2B                 | N467/1   | TRESK potassium channel  |
| L106/83  | Gephyrin               | N106/20  | Ankyrin-G                                       | N324/2    | Rem2                           | N468/37  | THIK-2 potassium channel |
| L107/39  | Neuroigin-2            | N106/36* | Ankyrin-G                                       | N325B/65  | THAP1                          | N470/22  | TRPM6                    |
| L107/90* | Neuroigin-2            | N106/65  | Ankyrin-G (staining)                            | N326D/2   | REEP2                          | N471/27  | Kv1.7 K+ channel         |
| L107/93  | Neuroigin-2            | N112/16  | Kir2.1 K+ channel                               | N326D/13  | REEP                           | N472/88  | MIRP4 K+ channel         |
| L107/95  | Neuroigin-2            | N112B/14 | Kir2.1 K+ channel                               | N327/95   | GluN2A/NR2A glutamate receptor | N473/36  | Cavbeta3 Ca2+ channel    |
| L109/39  | Calbindin              | N112B/29 | Kir2.1 K+ channel                               | N327A/38  | GluN2A/NR2A glutamate receptor | N476/9   | ZIP3                     |
| L109/57  | Calbindin              | N119/44  | MPP8                                            | N330A/80  | Alpha-2C adrenergic receptor   | N479/107 | VAPA/B                   |
| L109/62  | Calbindin              | N121A/1  | Pannexin-2                                      | N332B/15  | BAF53b                         | N479/12  | VAPA                     |
| L113/13  | Homer1L                | N123/19  | Histone H3-pThr11                               | N336B/83  | BAF53a                         | N479/22  | VAPA                     |
| L113/26  | Homer1L                | N123/48  | Histone H3-pThr11                               | N341/12   | LRRK1                          | N483/26  | Rufy3                    |
| L113/27  | Homer1L                | N125/10  | Thorase/Atad1                                   | N343/26   | NrCAM                          | N483/84  | Rufy3                    |
| L113/28  | Homer1L                | N126B/31 | Neuregulin-CRD (Cysteine-rich domain, Type III) | N345/51   | REEP1                          | N483/126 | Rufy3                    |
| L113/29  | Homer1L                | N128A/2  | Haspin/GSG2                                     | N347/42   | ATAT1                          | N485/22  | Prnt2                    |
| L113/44  | Homer1L                | N128A/4  | Maltose binding protein (MBP)                   | N349/96   | Foxi2                          | N486/25  | c-Fos                    |
| L113/62  | Homer1L/S              | N129/15  | Mad3 (human)                                    | N356/9    | SVOP                           | N486/32  | c-Fos                    |
| L113/130 | Homer1L/S              | N132A/12 | KLH                                             | N357/6*   | PINK1                          | N486/76  | c-Fos                    |

**Supplementary Table 2.** List of R-mAbs and their targets that were successfully cloned into the IgG2a mammalian expression plasmid using the sequence-based Gibson Assembly cloning method. \* cloned from hybridomas with more than two V<sub>L</sub> sequences. \*\* cloned from a hybridoma with two V<sub>L</sub> and two V<sub>H</sub> sequences.

**Supplementary Table 3. List of R-mAbs successfully transferred to IgG subclass-switched expression plasmids.**

| Transferred to IgG2b Expression Plasmid |                                           |          |                                | Transferred to IgG1 Expression Plasmid |                                 |
|-----------------------------------------|-------------------------------------------|----------|--------------------------------|----------------------------------------|---------------------------------|
| R-mAb                                   | Target                                    | R-mAb    | Target                         | R-mAb                                  | Target                          |
| A12/18                                  | Pan-Neurofascin (extracellular)           | N59/20   | GluN2B/NR2B glutamate receptor | A12/18                                 | Pan-Neurofascin (extracellular) |
| K7/45                                   | Kv1.5 K+ channel                          | N59/36   | GluN2B/NR2B glutamate receptor | K20/78                                 | Kv1.1 K+ channel                |
| K13/31                                  | Kv1.4 K+ channel                          | N68/6    | Nav1.7 Na+ channel             | K28/43                                 | PSD-95                          |
| K14/16                                  | Kv1.2 K+ channel                          | N69/46   | Shank3                         | K57/1                                  | Kv4.2 K+ channel (external)     |
| K17/70                                  | Kvbeta2 K+ channel                        | N70/28   | HCN1                           | K65/35                                 | CASPR/Neurexin IV               |
| K20/78                                  | Kv1.1 K+ channel                          | N76/8    | Ataxin-1, 11NQ                 | K75/41                                 | Kv4.3 K+ channel                |
| K28/43                                  | PSD-95                                    | N86/38   | GFP                            | L108/92                                | VIP                             |
| K39/25                                  | Kv2.1 K+ channel (external)               | N86/8    | GFP                            | L109/39                                | Calbindin                       |
| K57/1                                   | Kv4.2 K+ channel (external)               | N97A/31  | Neuroigin-1                    | L113/130                               | Homer1L/S                       |
| K64/15                                  | SAP97                                     | N106/36  | Ankyrin-G                      | L113/27                                | Homer1L                         |
| K65/35                                  | CASPR/Neurexin IV                         | N110/29  | Neuroigin-3                    | L118/80                                | VGAT                            |
| K66/38                                  | KChIP3 K+ channel                         | N112B/14 | Kir2.1 K+ channel              | L122/6                                 | Calretinin                      |
| K74/71                                  | Nav1.1 Na+ channel                        | N114/10  | HCN4                           | L122/68                                | Calretinin                      |
| K75/41                                  | Kv4.3 K+ channel                          | N133/21  | RGS14                          | L127/12                                | GAD65 + GAD67                   |
| K89/34                                  | Kv2.1 K+ channel                          | N133/35  | RGS14                          | L21/32                                 | GluA2/GluR2 glutamate receptor  |
| L6/60                                   | Slo1/BKAlpha maxi-K+ channel              | N134/12  | Nav1.8 Na+ channel             | L6/60                                  | Slo1/BKAlpha maxi-K+ channel    |
| L21/32                                  | GluA2/GluR2 glutamate receptor            | N149/25  | Olig1                          | L86/33                                 | AMIGO-1                         |
| L28/4                                   | Kv4.2 K+ channel                          | N151/3   | GABA(A)R, Delta                | N1/12                                  | KCC2                            |
| L57/46                                  | Cav1.2/1.3 Ca2+ channel                   | N168/6   | Navbeta4 Na+ channel           | N86/8                                  | Nav1.7 Na+ channel              |
| L60/4                                   | Copper ATPase 1 (Menke's disease protein) | N170A/1  | Neurexin-1-Beta                | N106/36                                | Ankyrin-G                       |
| L86/33                                  | AMIGO-1                                   | N178A/9  | Cav3.1 Ca2+ channel            | N112B/14                               | Kir2.1 K+ channel               |
| L86/36                                  | AMIGO-1                                   | N182/17  | QKI-6                          | N133/21                                | RGS14                           |
| L106/83                                 | Gephyrin                                  | N196/16  | PARIS/ZNF746                   | N134/12                                | Nav1.8 Na+ channel              |
| L107/39                                 | Neuroigin-2                               | N201/35  | Iduna/RNF146                   | N149/25                                | Olig1                           |
| L108/92                                 | VIP                                       | N206A/8  | GFAP                           | N170A/1                                | Neurexin-1-Beta                 |
| L109/39                                 | Calbindin                                 | N212/17  | TRIP8b (constant)              | N206A/8                                | GFAP                            |
| L113/27                                 | Homer1L                                   | N241A/34 | LRRK2/Dardarin, C-terminus     | N241A/34                               | LRRK2/Dardarin, C-terminus      |
| L113/130                                | Homer1L/S                                 | N244/5   | SynCAM4                        | N263/31                                | Cav1.2 Ca2+ channel             |
| L114/3                                  | Parvalbumin                               | N263/31  | Cav1.2 Ca2+ channel            | N28/9                                  | VGluT1                          |
| L115/13                                 | NPY/Neuropeptide Y                        | N289/16  | SUR1                           | N29/29                                 | VGluT2                          |
| L118/80                                 | VGAT                                      | N295B/66 | Arl13b                         | N295B/66                               | Arl13b                          |
| L122/6                                  | Calretinin                                | N308/48  | GluN1/NR1 glutamate receptor   | N308/48                                | GluN1/NR1 glutamate receptor    |
| L122/68                                 | Calretinin                                | N327/95  | GluN2A/NR2A glutamate receptor | N327/95                                | GluN2A/NR2A glutamate receptor  |
| L127/8                                  | GAD67                                     | N355/1   | GluA1/GluR1 glutamate receptor | N355/1                                 | GluA1/GluR1 glutamate receptor  |
| L127/12                                 | GAD65/67                                  | N410/17  | Kv3.2 K+ channel               | N410/17                                | Kv3.2 K+ channel                |
| N1/12                                   | KCC2                                      | N425/45  | VACHT                          | N425/45                                | VACHT                           |
| N3/26                                   | KCNT1/Slo2.2/Slack K+ channel             |          |                                | N52A/42                                | Mortalin/GRP75                  |
| N6/38                                   | VACHT                                     |          |                                | N59/20                                 | GluN2B/NR2B glutamate receptor  |
| N7/18                                   | Cavbeta1 Ca2+ channel                     |          |                                | N59/36                                 | GluN2B/NR2B glutamate receptor  |
| N11/33                                  | KCNT2/Slo2.1/Slick K+ channel             |          |                                | N6/38                                  | VACHT                           |
| N28/9                                   | VGlut1                                    |          |                                | N68/6                                  | Nav1.7 Na+ channel              |
| N29/29                                  | VGluT2                                    |          |                                | N70/28                                 | HCN1                            |
| N52A/42                                 | Mortalin/GRP75                            |          |                                | N86/38                                 | GFP                             |



**Supplementary Table 3.** List of R-mAbs and their targets that were successfully transferred from the IgG2a mammalian expression plasmid into either an IgG2b and/or IgG1 mammalian expression plasmid using restriction digest/ligation-based cloning.

**Supplementary Table 4. List of scFvs successfully cloned via sequence-based cloning.**

| scFv    | Target                             | Plasmid  | Tags                  | scFv     | Target                                                | Plasmid  | Tags                 |
|---------|------------------------------------|----------|-----------------------|----------|-------------------------------------------------------|----------|----------------------|
| 1D8     | LRRK2/Dardarin-pSer910             | pcDNA3.4 | HA<br>sortase<br>His  | N67/15   | TrpC5                                                 | pcDNA3.4 | HA<br>sortase<br>His |
| A12/18  | Pan-Neurofascin<br>(extracellular) | pcDNA3.1 | sortase<br>His        | N68/6    | Nav1.7 Na channel                                     | pcDNA3.1 | sortase<br>His       |
| A12/18  | Pan-Neurofascin<br>(extracellular) | pcDNA3.1 | HA<br>sortase<br>His  | N69/46   | Shank3                                                | pcDNA3.4 | HA<br>sortase<br>His |
| K7/45   | Kv1.5 K channel                    | pcDNA3.4 | HA<br>sortase<br>His  | N86/20   | GFP                                                   | pcDNA3.4 | HA<br>sortase<br>His |
| K14/16  | Kv1.2 K channel                    | pcDNA3.1 | HA<br>His             | N86/38   | GFP                                                   | pcDNA3.1 | HA<br>His            |
| K17/70  | Kvbeta2/KCNAB2 K<br>channel        | pcDNA3.4 | HA<br>sortase<br>His  | N86/44   | GFP                                                   | pcDNA3.4 | HA<br>sortase<br>His |
| K20/78  | Kv1.1 K channel                    | pcDNA3.1 | sortase<br>His        | N93A/49  | GABA(B)R1                                             | pcDNA3.4 | HA<br>sortase<br>His |
| K20/78  | Kv1.1 K channel                    | pcDNA3.1 | HA<br>sortase<br>His  | N100/13  | GST                                                   | pcDNA3.4 | HA<br>sortase<br>His |
| K28/38  | PSD-95                             | pcDNA3.4 | HA<br>sortase<br>His  | N103/31  | Aldh1L1                                               | pcDNA3.1 | sortase<br>His       |
| K28/42  | PSD-95 PSD-93                      | pcDNA3.4 | HA<br>sortase<br>His  | N103/31  | Aldh1L1                                               | pcDNA3.1 | HA<br>sortase<br>His |
| K28/43  | PSD-95                             | pcDNA3.4 | HA<br>His             | N105/13  | Ankyrin-B                                             | pcDNA3.4 | HA<br>sortase<br>His |
| K28/43  | PSD-95                             | pcDNA3.1 | HA<br>Flag<br>sortase | N105/17  | Ankyrin-B                                             | pcDNA3.4 | HA<br>sortase<br>His |
| K28/74  | PSD-95                             | pcDNA3.4 | HA<br>sortase<br>His  | N106/20  | Ankyrin-G                                             | pcDNA3.4 | HA<br>sortase<br>His |
| K39/25  | Kv1.2 K channel<br>(extracellular) | pcDNA3.4 | HA<br>His             | N114/10  | HCN4                                                  | pcDNA3.1 | HA<br>sortase<br>His |
| K56A/50 | CASK                               | pcDNA3.4 | HA<br>sortase<br>His  | N125/10  | Thorase/Atad1                                         | pcDNA3.4 | HA<br>sortase<br>His |
| K56A/57 | CASK                               | pcDNA3.4 | HA<br>sortase<br>His  | N126B/31 | Neuregulin-CRD<br>(Cysteine-rich<br>domain, Type III) | pcDNA3.4 | HA<br>sortase<br>His |
| K60/73  | KChIP2b K channel                  | pcDNA3.4 | HA<br>sortase<br>His  | N129/15  | Mad3 (human)                                          | pcDNA3.4 | HA<br>sortase<br>His |
| K65/35  | CASPR/Neurexin IV                  | pcDNA3.1 | sortase<br>His        | N133/21  | RGS14                                                 | pcDNA3.1 | sortase<br>His       |
| K66/27  | KChIP3 K channel                   | pcDNA3.4 | HA<br>sortase<br>His  | N133/35  | RGS14                                                 | pcDNA3.4 | HA<br>sortase<br>His |
| K66/38  | KChIP3 K channel                   | pcDNA3.4 | HA<br>sortase<br>His  | N134/12  | Nav1.8 Na channel                                     | pcDNA3.1 | sortase<br>His       |
| K66/59  | KChIP3 K channel                   | pcDNA3.4 | HA<br>sortase<br>His  | N134/12  | Nav1.8 Na channel                                     | pcDNA3.1 | HA<br>sortase<br>His |
| K89/34  | Kv2.1 K channel                    | pcDNA3.4 | HA<br>His             | N144/17  | Gamma-<br>protocadherin-A3                            | pcDNA3.4 | HA<br>sortase<br>His |

|                |                                    |          |                       |                |                                          |          |                      |
|----------------|------------------------------------|----------|-----------------------|----------------|------------------------------------------|----------|----------------------|
| K89/34         | Kv2.1 K channel                    | pcDNA3.1 | HA<br>Flag<br>sortase | N144/32        | Pan-Gamma-<br>protocadherin-A            | pcDNA3.4 | HA<br>sortase<br>His |
| K89/34<br>Flag | Kv2.1 K channel                    | pcDNA3.4 | HA<br>His<br>Flag     | N149/25        | Olig1                                    | pcDNA3.4 | HA<br>sortase<br>His |
| K89/41         | Kv2.1 K channel                    | pcDNA3.4 | HA<br>sortase<br>His  | N151/3         | GABA(A)R, Delta                          | pcDNA3.4 | HA<br>sortase<br>His |
| K96/7          | Pancortin                          | pcDNA3.4 | HA<br>sortase<br>His  | N159/5         | Pan-Gamma-<br>protocadherin-<br>Constant | pcDNA3.4 | HA<br>sortase<br>His |
| L11A/41        | Pan-Neurofascin                    | pcDNA3.4 | HA<br>sortase<br>His  | N160/21        | SynDIG3/Tmem91                           | pcDNA3.4 | HA<br>sortase<br>His |
| L23/27         | Kv1.3 K channel                    | pcDNA3.1 | HA<br>sortase<br>His  | N170A/1        | Neurexin-1-Beta                          | pcDNA3.1 | HA<br>sortase<br>His |
| L24/1          | IP3 receptor, type 1               | pcDNA3.4 | HA<br>sortase<br>His  | N170A/26       | Neurexin-1-Beta                          | pcDNA3.4 | HA<br>sortase<br>His |
| L48A/9         | Cav1.3 Ca2 channel                 | pcDNA3.4 | HA<br>sortase<br>His  | N183/15        | QKI-7                                    | pcDNA3.4 | HA<br>sortase<br>His |
| L61C/30        | Kv2.1 K channel                    | pcDNA3.4 | HA<br>sortase<br>His  | N185/7         | NALCN                                    | pcDNA3.4 | HA<br>sortase<br>His |
| L71/5          | Kv1.4 K channel<br>(extracellular) | pcDNA3.4 | HA<br>sortase<br>His  | N196/16        | PARIS/ZNF746                             | pcDNA3.4 | HA<br>sortase<br>His |
| L76/36         | Kv1.2 K channel                    | pcDNA3.4 | HA<br>sortase<br>His  | N201/35        | Iduna/RNF146                             | pcDNA3.4 | HA<br>sortase<br>His |
| L83/11         | Kv2.1 K channel                    | pcDNA3.4 | HA<br>sortase<br>His  | N206A/8        | GFAP                                     | pcDNA3.1 | sortase<br>His       |
| L86/33         | AMIGO-1                            | pcDNA3.4 | HA<br>sortase<br>His  | N207/27        | LRP4 (extracellular)                     | pcDNA3.4 | HA<br>sortase<br>His |
| L107/39        | Neuroigin-2                        | pcDNA3.1 | sortase<br>His        | N212/17        | TRIP8b (constant)                        | pcDNA3.4 | HA<br>sortase<br>His |
| L107/90        | Neuroigin-2                        | pcDNA3.4 | HA<br>sortase<br>His  | N221/17        | TRIP8b (constant)                        | pcDNA3.1 | sortase<br>His       |
| L107/95        | Neuroigin-2                        | pcDNA3.4 | HA<br>sortase<br>His  | N212A/34       | TRIP8b (exon 1b)                         | pcDNA3.4 | HA<br>sortase<br>His |
| L109/57        | Calbindin                          | pcDNA3.4 | HA<br>His             | N221/17        | TrpV1                                    | pcDNA3.4 | HA<br>sortase<br>His |
| L113/13        | Homer1L                            | pcDNA3.1 | sortase<br>His        | N225A/10       | FGF13/FHF2, B<br>isoform                 | pcDNA3.4 | HA<br>sortase<br>His |
| L113/13        | Homer1L                            | pcDNA3.1 | HA<br>sortase<br>His  | N241A/34       | LRRK2/Dardarin, C-<br>terminus           | pcDNA3.1 | sortase<br>His       |
| L113/130       | Homer1L/S                          | pcDNA3.1 | sortase<br>His        | N263/31<br>LC1 | Cav1.2 Ca2 channel                       | pcDNA3.4 | HA<br>His            |
| L113/130       | Homer1L/S                          | pcDNA3.1 | HA<br>sortase<br>His  | N270/47        | Synaptotagmin-6                          | pcDNA3.4 | HA<br>sortase<br>His |
| L113/27        | Homer1L                            | pcDNA3.1 | sortase<br>His        | N276A/15       | Synaptotagmin-9                          | pcDNA3.4 | HA<br>sortase<br>His |
| L113/27        | Homer1L                            | pcDNA3.1 | HA<br>sortase<br>His  | N289/16        | SUR1                                     | pcDNA3.4 | HA<br>sortase<br>His |

|             |                    |          |                      |          |                                   |          |                      |
|-------------|--------------------|----------|----------------------|----------|-----------------------------------|----------|----------------------|
| L113/28     | Homer1L            | pcDNA3.4 | HA<br>sortase<br>His | N295B/66 | Arl13b                            | pcDNA3.1 | HA<br>His            |
| L113/44     | Homer1L            | pcDNA3.4 | HA<br>sortase<br>His | N355/1   | GluA1/GluR1<br>glutamate receptor | pcDNA3.1 | sortase<br>His       |
| L114/3      | Parvalbumin        | pCDNA3.4 | HA<br>His            | N363/71  | Kir6.2 K channel                  | pcDNA3.4 | HA<br>sortase<br>His |
| L114/3 Flag | Parvalbumin        | pcDNA3.4 | HA<br>His<br>Flag    | N366/60  | Kir6.1 K channel                  | pcDNA3.4 | HA<br>sortase<br>His |
| L114/81     | Parvalbumin        | pCDNA3.4 | HA<br>His            | N367/51  | Shank1 and Shank3                 | pcDNA3.4 | HA<br>sortase<br>His |
| L115/13     | NPY/Neuropeptide Y | pcDNA3.1 | sortase<br>His       | N372B/1  | Kv2.2 K channel                   | pcDNA3.4 | HA<br>sortase<br>His |
| L115/13     | NPY/Neuropeptide Y | pcDNA3.1 | HA<br>sortase<br>His | N372B/60 | Kv2.2 K channel                   | pcDNA3.4 | HA<br>sortase<br>His |
| L117/1      | IRSp53/BAIAP2      | pcDNA3.1 | sortase<br>His       | N375/67  | Kv3.3 K channel                   | pcDNA3.4 | HA<br>sortase<br>His |
| L117/1      | IRSp53/BAIAP2      | pcDNA3.1 | HA<br>sortase<br>His | N393/2   | Beta4-spectrin                    | pcDNA3.4 | HA<br>sortase<br>His |
| L118/14     | VGAT               | pcDNA3.4 | HA<br>sortase<br>His | N398A/34 | GABA(A)R, Alpha4                  | pcDNA3.4 | HA<br>sortase<br>His |
| L120/12     | Collybistin        | pcDNA3.1 | sortase<br>His       | N399/19  | GABA(A)R, Alpha2                  | pcDNA3.4 | HA<br>sortase<br>His |
| L121/133    | nNOS/NOS1          | pcDNA3.4 | HA<br>sortase<br>His | N402/46  | Thyroid hormone<br>receptor beta1 | pcDNA3.4 | HA<br>sortase<br>His |
| L121/136    | nNOS/NOS1          | pcDNA3.4 | HA<br>sortase<br>His | N403/63  | Pan-Thyroid<br>hormone receptor   | pcDNA3.4 | HA<br>sortase<br>His |
| L122/6      | Calretinin         | pCDNA3.4 | HA<br>His            | N414/25  | NCKX4                             | pcDNA3.4 | HA<br>sortase<br>His |
| L122/68     | Calretinin         | pcDNA3.1 | sortase<br>His       | N422/18  | GluN2C/NR2C<br>glutamate receptor | pcDNA3.4 | HA<br>sortase<br>His |
| L124/59     | Bassoon            | pcDNA3.1 | sortase<br>His       | N432/21  | VSP                               | pcDNA3.4 | HA<br>sortase<br>His |
| L124/59     | Bassoon            | pcDNA3.1 | HA<br>sortase<br>His | N432/63  | VSP                               | pcDNA3.4 | HA<br>sortase<br>His |
| L125/129    | Pan-Synapsin       | pcDNA3.1 | sortase<br>His       | N448/88  | Kv8.2 K channel                   | pcDNA3.4 | HA<br>sortase<br>His |
| L127/8      | GAD67              | pcDNA3.1 | sortase<br>His       | N449/73  | VMAT2                             | pcDNA3.4 | HA<br>sortase<br>His |
| L130/1      | Tiam1              | pcDNA3.4 | HA<br>sortase<br>His | N452/73  | GABA(A)R,<br>Gamma2L/S            | pcDNA3.1 | sortase<br>His       |
| L131/17     | SPHKAP             | pcDNA3.4 | HA<br>sortase<br>His | N452/73  | GABA(A)R,<br>Gamma2L/S            | pcDNA3.1 | HA<br>sortase<br>His |
| L131/20     | SPHKAP             | pcDNA3.4 | HA<br>sortase<br>His | N452/81  | GABA(A)R,<br>Gamma2L/S            | pcDNA3.1 | sortase<br>His       |
| L131/27     | SPHKAP             | pcDNA3.4 | HA<br>sortase<br>His | N452/81  | GABA(A)R,<br>Gamma2L/S            | pcDNA3.1 | HA<br>sortase<br>His |

|            |                                |          |                      |                                           |                                |          |                      |
|------------|--------------------------------|----------|----------------------|-------------------------------------------|--------------------------------|----------|----------------------|
| N1/12      | KCC2                           | pcDNA3.1 | HA<br>sortase<br>His | N471/27                                   | Kv1.7 K channel                | pcDNA3.4 | HA<br>sortase<br>His |
| N16B/8     | Kv3.1b K channel               | pcDNA3.1 | sortase<br>His       | N479/107                                  | VAPA/B                         | pcDNA3.4 | HA<br>sortase<br>His |
| N18/28     | PSD-93/Chapsyn-110             | pcDNA3.4 | HA<br>sortase<br>His | N479/12                                   | VAPA                           | pcDNA3.4 | HA<br>sortase<br>His |
| N22/21     | Shank1                         | pcDNA3.4 | HA<br>sortase<br>His | N483/26                                   | Rufy3                          | pcDNA3.4 | HA<br>sortase<br>His |
| N23B/6     | Shank2                         | pcDNA3.4 | HA<br>sortase<br>His | N483/84                                   | Rufy3                          | pcDNA3.4 | HA<br>sortase<br>His |
| N23B/49    | Pan-Shank                      | pcDNA3.1 | HA<br>sortase<br>His | N483/126                                  | Rufy3                          | pcDNA3.1 | sortase<br>His       |
| N28/9      | VGlut1                         | pcDNA3.1 | HA<br>His            | N483/126                                  | Rufy3                          | pcDNA3.1 | HA<br>sortase<br>His |
| N28/9 Flag | VGlut1                         | pcDNA3.4 | HA<br>His<br>Flag    | N486/32                                   | c-Fos                          | pcDNA3.4 | HA<br>His            |
| N29/29     | VGlut2                         | pcDNA3.1 | HA<br>His            | N486/76                                   | c-Fos                          | pcDNA3.4 | HA<br>sortase<br>His |
| N43/6      | Kv7.4/KCNQ4 K channel          | pcDNA3.4 | HA<br>sortase<br>His | N112B/29                                  | Kir2.1 K+ channel              | pcDNA3.4 | HA<br>sortase<br>His |
| N53/32     | BKbeta2 K channel              | pcDNA3.4 | HA<br>sortase<br>His | N140A/12                                  | SALM5/LRFN5                    | pcDNA3.4 | HA<br>sortase<br>His |
| N52A/42    | Mortalin/GRP75                 | pcDNA3.1 | HA<br>His            | N155/9                                    | Uncx                           | pcDNA3.4 | HA<br>sortase<br>His |
| N52B/27    | SALM2/LRFN1                    | pcDNA3.4 | HA<br>sortase<br>His | N294A/6                                   | Brevican                       | pcDNA3.4 | HA<br>sortase<br>His |
| N59/20     | GluN2B/NR2B glutamate receptor | pcDNA3.1 | sortase<br>His       | N312/10                                   | NSD1                           | pcDNA3.4 | HA<br>sortase<br>His |
| N59/20     | GluN2B/NR2B glutamate receptor | pcDNA3.1 | HA<br>sortase<br>His | N411/51                                   | Arx                            | pcDNA3.4 | HA<br>sortase<br>His |
| N59/36     | GluN2B/NR2B glutamate receptor | pcDNA3.1 | HA<br>sortase<br>His | N416/57                                   | GluN3A/NR3A glutamate receptor | pcDNA3.4 | HA<br>sortase<br>His |
| N59/36     | GluN2B/NR2B glutamate receptor | pcDNA3.1 | HA<br>His            | N424/45                                   | Glycine receptor Alpha3        | pcDNA3.4 | HA<br>sortase<br>His |
| D4/154     | Kv2.1 K+ channel               | pcDNA3.4 | HA<br>sortase<br>His | N428/12                                   | WRN                            | pcDNA3.4 | HA<br>sortase<br>His |
| K57/41     | Kv4.2 K+ channel (external)    | pcDNA3.4 | HA<br>sortase<br>His | N452/30                                   | GABA-A-R-Gamma2L/S, GABRG2     | pcDNA3.4 | HA<br>sortase<br>His |
| L24/21     | IP3R                           | pcDNA3.4 | HA<br>sortase<br>His | N473/36.3                                 | Cavbeta3 Ca2+ channel          | pcDNA3.4 | HA<br>sortase<br>His |
| L86/14     | AMIGO-1                        | pcDNA3.4 | HA<br>sortase<br>His | N485/22                                   | Prrt2                          | pcDNA3.4 | HA<br>sortase<br>His |
| L86/2      | AMIGO-1                        | pcDNA3.4 | HA<br>sortase<br>His | <b>V<sub>L</sub>-linker-V<sub>H</sub></b> |                                |          |                      |
| L106/23    | Gephyrin                       | pcDNA3.4 | HA<br>sortase<br>His | L6/60                                     | Slo1/BKAlpha maxi-K channel    | pcDNA3.4 | HA<br>sortase<br>His |

|          |                                      |          |                      |          |                  |          |                      |
|----------|--------------------------------------|----------|----------------------|----------|------------------|----------|----------------------|
| L114/38  | Parvalbumin                          | pcDNA3.4 | HA<br>sortase<br>His | N86/8    | GFP              | pcDNA3.4 | HA<br>sortase<br>His |
| L122/144 | Calretinin                           | pcDNA3.4 | HA<br>sortase<br>His | N95/35   | GABA(A)R, Alpha1 | pcDNA3.4 | HA<br>sortase<br>His |
| L123/46  | GABA(A)R, Theta                      | pcDNA3.4 | HA<br>sortase<br>His | N106/36  | Ankyrin-G        | pcDNA3.4 | HA<br>sortase<br>His |
| N7/18    | Cavbeta1 Ca <sup>2+</sup><br>channel | pcDNA3.4 | HA<br>sortase<br>His | N112B/14 | Kir2.1 K channel | pcDNA3.4 | HA<br>sortase<br>His |
| N56/21   | FGF14a                               | pcDNA3.4 | HA<br>sortase<br>His | N377/20  | MAP3K12          | pcDNA3.1 | HA<br>sortase<br>His |
| N112/16  | Kir2.1 K <sup>+</sup> channel        | pcDNA3.4 | HA<br>sortase<br>His |          |                  |          |                      |

**Supplementary Table 4.** List of scFvs and their targets that were successfully cloned into either pcDNA3.1 or pcDNA3.4 mammalian expression plasmids using the sequence-based Gibson Assembly cloning method. All are in the V<sub>H</sub>-linker-V<sub>L</sub> format except as noted. Tags indicate the presence of HA or Flag epitope tags, a sortase labelling tag and/or the 6xHis purification tag at the C-terminus of the scFv.
